# Supplementary material for: Clock refinement in imperative synchronous languages
Source: Springer Nature journal article supplement (doi:10.1186/1687-3963-2013-3), 2013-04-10
Supplement: 13639_2012_22_MOESM1_ESM.pdf [file 13639_2012_22_MOESM1_ESM.pdf]

```

module P1
  (nat ?i1, ?i2, o1, o2)
{
  nat x;
  loop {
    o1 = i1 + i2;
    x = i1;
    l1: pause;
    o1 = o2 + i1 + x;
    o2 = i2;
    x = 2;
    l2: pause;
    if(i1 > 4)
      o1 = i1;
    o2 = i1 + o1;
    l3: pause;
  }
}

```

| Steps            |    | 1 | 2 | 3  | 4  | 5 |
|------------------|----|---|---|----|----|---|
| Inputs           | i1 | 1 | 2 | 3  | 4  | 5 |
|                  | i2 | 2 | 4 | 6  | 8  | 0 |
| Labels           | st | T | F | F  | F  | F |
|                  | l1 | F | T | F  | F  | T |
|                  | l2 | F | F | T  | F  | F |
|                  | l3 | F | F | F  | T  | F |
| Locals & Outputs | x  | 1 | 2 | 2  | 4  | 2 |
|                  | o1 | 3 | 8 | 8  | 12 | 7 |
|                  | o2 | 0 | 4 | 11 | 11 | 0 |

(a) P1 Source Code

(b) Sample Execution Trace
