# Supplementary material for: Clock refinement in imperative synchronous languages
Source: Springer Nature journal article supplement (doi:10.1186/1687-3963-2013-3), 2013-04-10
Supplement: 13639_2012_22_MOESM2_ESM.pdf [file 13639_2012_22_MOESM2_ESM.pdf]

$$\text{st} \Rightarrow \text{o1} = \text{i1} + \text{i2}$$

$$\text{st} \Rightarrow \text{x} = \text{i2}$$

$$\text{l1} \Rightarrow \text{o1} = \text{x} + \text{i1} + \text{o2}$$

$$\text{l1} \Rightarrow \text{o2} = \text{i2}$$

$$\text{l1} \Rightarrow \text{x} = 2$$

$$\text{l2} \wedge \text{i1} > 4 \Rightarrow \text{o1} = \text{i1}$$

$$\text{l2} \Rightarrow \text{o2} = \text{i1} + \text{o1}$$

$$\text{l3} \Rightarrow \text{o1} = \text{i1} + \text{i2}$$

$$\text{l3} \Rightarrow \text{x} = \text{i2}$$

*Data-Flow Actions*

$$\text{st} \Rightarrow \text{next}(\text{l1}) = \text{true}$$

$$\text{l1} \Rightarrow \text{next}(\text{l2}) = \text{true}$$

$$\text{l2} \Rightarrow \text{next}(\text{l3}) = \text{true}$$

$$\text{l3} \Rightarrow \text{next}(\text{l1}) = \text{true}$$

*Control-Flow Actions*
