# Supplementary material for: Clock refinement in imperative synchronous languages
Source: Springer Nature journal article supplement (doi:10.1186/1687-3963-2013-3), 2013-04-10
Supplement: 13639_2012_22_MOESM4_ESM.pdf [file 13639_2012_22_MOESM4_ESM.pdf]

|     | 1 | 2 | 3 | 4 | 5 | 6 |
|-----|---|---|---|---|---|---|
| a   | 7 | 7 | 7 | 7 | 7 | 7 |
| b   | 3 | 3 | 3 | 3 | 3 | 3 |
| st  | T | F | F | F | F | F |
| l   | F | T | T | T | T | T |
| x   | 7 | 4 | 1 | 1 | 1 | 0 |
| y   | 3 | 3 | 3 | 2 | 1 | 1 |
| gcd | 0 | 0 | 0 | 0 | 0 | 1 |

(a) Single Clock

|     | 1     | 2     | 3 | 4 | 5 | 6 |
|-----|-------|-------|---|---|---|---|
| a   | 7     | _____ |   |   |   |   |
| b   | 3     | _____ |   |   |   |   |
| st  | T     | F     | F | F | F | F |
| l   | F     | T     | T | T | T | T |
| x   | 7     | 4     | 1 | 1 | 1 | 0 |
| y   | 3     | 3     | 3 | 2 | 1 | 1 |
| gcd | _____ |       |   |   |   | 1 |

(b) Clock Refinement
