# Supplementary material for: Clock refinement in imperative synchronous languages
Source: Springer Nature journal article supplement (doi:10.1186/1687-3963-2013-3), 2013-04-10
Supplement: 13639_2012_22_MOESM5_ESM.pdf [file 13639_2012_22_MOESM5_ESM.pdf]

```

module Clocktree(...)
{
  clock(C1) {
    clock(C2) {...}
  }
  clock(C3) {
    clock(C4) {...}
    ||
    clock(C5) {...}
  }
}

```

(a) Code Structure

$\Rightarrow$

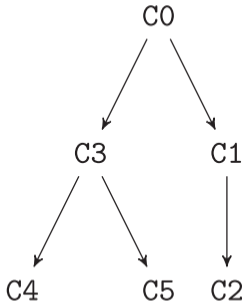

(b) Clock Tree
