# Supplementary material for: Clock refinement in imperative synchronous languages
Source: Springer Nature journal article supplement (doi:10.1186/1687-3963-2013-3), 2013-04-10
Supplement: 13639_2012_22_MOESM6_ESM.pdf [file 13639_2012_22_MOESM6_ESM.pdf]

```
clock (C1) {  
    11: pause;  
     $A_1$   
    12: pause (C1);  
     $A_2$   
    13: pause;  
} || {  
    14: pause;  
     $A_3$   
    15: pause;  
}
```
