# Supplementary material for: Clock refinement in imperative synchronous languages
Source: Springer Nature journal article supplement (doi:10.1186/1687-3963-2013-3), 2013-04-10
Supplement: 13639_2012_22_MOESM8_ESM.pdf [file 13639_2012_22_MOESM8_ESM.pdf]

# A Transition Rules

## Assignments

$$(a_1) \quad \frac{\mathcal{E}(x) = \llbracket \tau \rrbracket_{\mathcal{E}}}{\langle \mathcal{E}, C_S, x = \tau \rangle \xrightarrow{c} \langle \mathbf{nothing}, \{x = \tau\}, \{\} \rangle}$$
$$(a_2) \quad \langle \mathcal{E}, C_S, \mathbf{next}(x) = \tau \rangle \xrightarrow{c} \langle \mathbf{nothing}, \{\mathbf{next}(x) = \tau\}, \{\} \rangle$$

## Time Consuming Statements

$$(p_1) \quad \langle \mathcal{E}, C_S, \mathbf{await clock}(C) \rangle \xrightarrow{c} \left\langle \begin{array}{l} \mathbf{immediate} \\ \mathbf{await clock}(C) \end{array}, \{\}, \{C\} \right\rangle$$
$$(p_2) \quad \frac{}{\left\langle \mathcal{E}, C_S, \begin{array}{l} \mathbf{immediate} \\ \mathbf{await clock}(C) \end{array} \right\rangle \xrightarrow{c} \langle \mathbf{nothing}, \{\}, \{\} \rangle}$$
$$(p_3) \quad \frac{}{\left\langle \mathcal{E}, C_S, \begin{array}{l} \mathbf{immediate} \\ \mathbf{await clock}(C) \end{array} \right\rangle \xrightarrow{c} \left\langle \begin{array}{l} \mathbf{immediate} \\ \mathbf{await clock}(C) \end{array}, \{\}, \{C\} \right\rangle}$$

## Clock Definitions

$$(c_1) \quad \frac{C \neq \{\} \wedge \langle \mathcal{E}, C, S \rangle \xrightarrow{c} \langle S', A, C \rangle}{\langle \mathcal{E}, C_S, \mathbf{clock}(C)\{S\} \rangle \xrightarrow{c} \langle \mathbf{clock}(C)\{S'\}, A, C \rangle}$$
$$(c_2) \quad \frac{C = \{\} \wedge \langle \mathcal{E}, C, S \rangle \xrightarrow{c} \langle S', A, C \rangle}{\langle \mathcal{E}, C_S, \mathbf{clock}(C)\{S\} \rangle \xrightarrow{c} \langle S', A, C \rangle}$$

## Conditional Statements

$$(i_1) \quad \frac{\llbracket \sigma \rrbracket_{\mathcal{E}} = \mathbf{true} \wedge \langle \mathcal{E}, C_S, S_1 \rangle \xrightarrow{c} \langle S'_1, A_1, C_1 \rangle}{\langle \mathcal{E}, C_S, \mathbf{if}(\sigma) S_1 \mathbf{else} S_2 \rangle \xrightarrow{c} \langle S'_1, A_1, C_1 \rangle}$$
$$(i_2) \quad \frac{\llbracket \sigma \rrbracket_{\mathcal{E}} = \mathbf{false} \wedge \langle \mathcal{E}, C_S, S_2 \rangle \xrightarrow{c} \langle S'_2, A_2, C_2 \rangle}{\langle \mathcal{E}, C_S, \mathbf{if}(\sigma) S_1 \mathbf{else} S_2 \rangle \xrightarrow{c} \langle S'_2, A_2, C_2 \rangle}$$

## Sequence

$$(s_1) \quad \frac{C_1 \neq \{\} \wedge \langle \mathcal{E}, C_S, S_1 \rangle \xrightarrow{c} \langle S'_1, A_1, C_1 \rangle}{\langle \mathcal{E}, C_S, S_1; S_2 \rangle \xrightarrow{c} \langle S'_1; S_2, A_1, C_1 \rangle}$$
$$(s_2) \quad \frac{C_1 = \{\} \wedge \langle \mathcal{E}, C_S, S_1 \rangle \xrightarrow{c} \langle S'_1, A_1, C_1 \rangle \wedge \langle \mathcal{E}, C_S, S_2 \rangle \xrightarrow{c} \langle S'_2, A_2, C_2 \rangle}{\langle \mathcal{E}, C_S, S_1; S_2 \rangle \xrightarrow{c} \langle S'_2, A_1 \cup A_2, C_2 \rangle}$$
