# Supplementary material for: Clock refinement in imperative synchronous languages
Source: Springer Nature journal article supplement (doi:10.1186/1687-3963-2013-3), 2013-04-10
Supplement: 13639_2012_22_MOESM9_ESM.pdf [file 13639_2012_22_MOESM9_ESM.pdf]

# Parallel Threads

$$(p_1) \frac{(\mathcal{E}, C_S, S_1) \xrightarrow{c} (S'_1, A_1, C_1) \wedge (\mathcal{E}, C_S, S_2) \xrightarrow{c} (S'_2, A_2, C_2)}{(\mathcal{E}, C_S, S_1 \parallel S_2) \xrightarrow{c} (S'_1 \parallel S'_2, A_1 \cup A_2, C_1 \cup C_2)}$$
