# Supplementary material for: Clock refinement in imperative synchronous languages
Source: Springer Nature journal article supplement (doi:10.1186/1687-3963-2013-3), 2013-04-10
Supplement: 13639_2012_22_MOESM10_ESM.pdf [file 13639_2012_22_MOESM10_ESM.pdf]

(Strong) Abortion

- (a<sub>1</sub>) 
$$\frac{C = \{\} \wedge \langle \mathcal{E}, C_S, S \rangle \xrightarrow{c} \langle S', \mathcal{A}, C \rangle}{\langle \mathcal{E}, C_S, \mathbf{abort} S \mathbf{when}(\sigma) \rangle \xrightarrow{c} \langle \mathbf{nothing}, \mathcal{A}, C \rangle}$$
- (a<sub>2</sub>) 
$$\frac{\forall c \in \mathcal{C}. c \prec C_S \wedge C \neq \{\} \wedge \langle \mathcal{E}, C_S, S \rangle \xrightarrow{c} \langle S', \mathcal{A}, C \rangle}{\langle \mathcal{E}, C_S, \mathbf{abort} S \mathbf{when}(\sigma) \rangle \xrightarrow{c} \langle \mathbf{abort} S' \mathbf{when}(\sigma), \mathcal{A}, C \rangle}$$
- (a<sub>2</sub>) 
$$\frac{\forall c \in \mathcal{C}. c \succeq C_S \wedge C \neq \{\} \wedge \langle \mathcal{E}, C_S, S \rangle \xrightarrow{c} \langle S', \mathcal{A}, C \rangle}{\langle \mathcal{E}, C_S, \mathbf{abort} S \mathbf{when}(\sigma) \rangle \xrightarrow{c} \langle \mathbf{immediate abort} S' \mathbf{when}(\sigma), \mathcal{A}, C \rangle}$$
- (a<sub>3</sub>) 
$$\frac{[\sigma]_{\mathcal{E}} = \mathbf{true}}{\langle \mathcal{E}, C_S, \mathbf{immediate abort} S \mathbf{when}(\sigma) \rangle \xrightarrow{c} \langle \mathbf{nothing}, \{\}, \{\} \rangle}$$
- (a<sub>4</sub>) 
$$\frac{[\sigma]_{\mathcal{E}} = \mathbf{false} \wedge C \neq \{\} \wedge \langle \mathcal{E}, C_S, S \rangle \xrightarrow{c} \langle S', \mathcal{A}, C \rangle}{\left\langle \begin{array}{c} \mathbf{immediate abort} \\ \mathcal{E}, C_S, S \\ \mathbf{when}(\sigma) \end{array} \right\rangle \xrightarrow{c} \left\langle \begin{array}{c} \mathbf{immediate abort} \\ S' \\ \mathbf{when}(\sigma) \end{array}, \mathcal{A}, C \right\rangle}$$
- (a<sub>5</sub>) 
$$\frac{[\sigma]_{\mathcal{E}} = \mathbf{false} \wedge C = \{\} \wedge \langle \mathcal{E}, C_S, S \rangle \xrightarrow{c} \langle S', \mathcal{A}, C \rangle}{\langle \mathcal{E}, C_S, \mathbf{immediate abort} S \mathbf{when}(\sigma) \rangle \xrightarrow{c} \langle \mathbf{nothing}, \mathcal{A}, C \rangle}$$
