# Supplementary material for: Clock refinement in imperative synchronous languages
Source: Springer Nature journal article supplement (doi:10.1186/1687-3963-2013-3), 2013-04-10
Supplement: 13639_2012_22_MOESM11_ESM.pdf [file 13639_2012_22_MOESM11_ESM.pdf]

$$\begin{array}{c}
(a_1) \quad \frac{C = \{\} \wedge \langle \mathcal{E}, C_S, S \rangle \xrightarrow{c} \langle S', \mathcal{A}, C \rangle}{\langle \mathcal{E}, C_S, \mathbf{suspend} S \mathbf{when}(\sigma) \rangle \xrightarrow{c} \langle \mathbf{nothing}, \mathcal{A}, C \rangle} \\
(a_2) \quad \frac{\forall c \in \mathcal{C}. c < C_S \wedge C \neq \{\} \wedge \langle \mathcal{E}, C_S, S \rangle \xrightarrow{c} \langle S', \mathcal{A}, C \rangle}{\langle \mathcal{E}, C_S, \mathbf{suspend} S \mathbf{when}(\sigma) \rangle \xrightarrow{c} \langle \mathbf{suspend} S' \mathbf{when}(\sigma), \mathcal{A}, C \rangle} \\
(a_2) \quad \frac{\forall c \in \mathcal{C}. c \succeq C_S \wedge C \neq \{\} \wedge \langle \mathcal{E}, C_S, S \rangle \xrightarrow{c} \langle S', \mathcal{A}, C \rangle}{\langle \mathcal{E}, C_S, \mathbf{suspend} S \mathbf{when}(\sigma) \rangle \xrightarrow{c} \left\langle \begin{array}{l} \mathbf{immediate} \\ \mathbf{suspend} S' \mathbf{when}(\sigma) \end{array}, \mathcal{A}, C \right\rangle} \\
(a_3) \quad \frac{\llbracket \sigma \rrbracket_{\mathcal{E}} = \mathbf{true}}{\left\langle \mathcal{E}, C_S, \begin{array}{l} \mathbf{immediate} \\ \mathbf{suspend} S \mathbf{when}(\sigma) \end{array} \right\rangle \xrightarrow{c} \left\langle \begin{array}{l} \mathbf{immediate} \\ \mathbf{suspend} S \mathbf{when}(\sigma) \end{array}, \{\}, \{C_S\} \right\rangle} \\
(a_4) \quad \frac{\llbracket \sigma \rrbracket_{\mathcal{E}} = \mathbf{false} \wedge C \neq \{\} \wedge \langle \mathcal{E}, C_S, S \rangle \xrightarrow{c} \langle S', \mathcal{A}, C \rangle}{\left\langle \mathcal{E}, C_S, \begin{array}{l} \mathbf{immediate} \\ \mathbf{suspend} S \mathbf{when}(\sigma) \end{array} \right\rangle \xrightarrow{c} \left\langle \begin{array}{l} \mathbf{immediate} \\ \mathbf{suspend} S' \mathbf{when}(\sigma) \end{array}, \mathcal{A}, C \right\rangle} \\
(a_5) \quad \frac{\llbracket \sigma \rrbracket_{\mathcal{E}} = \mathbf{false} \wedge C = \{\} \wedge \langle \mathcal{E}, C_S, S \rangle \xrightarrow{c} \langle S', \mathcal{A}, C \rangle}{\langle \mathcal{E}, C_S, \mathbf{immediate} \mathbf{suspend} S \mathbf{when}(\sigma) \rangle \xrightarrow{c} \langle \mathbf{nothing}, \mathcal{A}, C \rangle}
\end{array}$$
