# Supplementary material for: Clock refinement in imperative synchronous languages
Source: Springer Nature journal article supplement (doi:10.1186/1687-3963-2013-3), 2013-04-10
Supplement: 13639_2012_22_MOESM13_ESM.pdf [file 13639_2012_22_MOESM13_ESM.pdf]

```

function CompileDepth( $c, S$ )
begin
  switch  $S$ 
  case [nothing]:
    return ( $\{\}, \{\}$ )
  case [ $x = \tau$ ]: # actions
    return ( $\{\}, \{\}$ )
  case [ $\ell$ : pause( $C$ )]: # pause
    return ( $\{\}, \{\ell \wedge C \wedge \text{susp}_S(C) \Rightarrow \text{next}(\ell) = \text{true}\}$ )
  case [if ( $\gamma$ ) {  $S_1$  } else {  $S_2$  }]: # conditional
    ( $\mathcal{A}_1^{\text{data}}, \mathcal{A}_1^{\text{ctrl}}$ ) := CompileDepth( $c, S_1$ )
    ( $\mathcal{A}_2^{\text{data}}, \mathcal{A}_2^{\text{ctrl}}$ ) := CompileDepth( $c, S_2$ )
    return ( $\mathcal{A}_1^{\text{data}} \cup \mathcal{A}_2^{\text{data}}, \mathcal{A}_1^{\text{ctrl}} \cup \mathcal{A}_2^{\text{ctrl}}$ )
  case [ $S_1$ ;  $S_2$ ]: # sequence
    ( $\mathcal{A}_1^{\text{data}}, \mathcal{A}_1^{\text{ctrl}}$ ) := CompileDepth( $c, S_1$ )
    ( $\mathcal{A}_2^{\text{data}}, \mathcal{A}_2^{\text{ctrl}}$ ) := CompileSurface( $c, \text{term}_{S_1}, S_2$ )
    ( $\mathcal{A}_2^{\text{data}}, \mathcal{A}_2^{\text{ctrl}}$ ) := CompileDepth( $c, S_2$ )
    return ( $\mathcal{A}_1^{\text{data}} \cup \mathcal{A}_2^{\text{data}}, \mathcal{A}_1^{\text{ctrl}} \cup \mathcal{A}_2^{\text{ctrl}}$ )
  case [ $S_1$  ||  $S_2$ ]: # parallel threads
    ( $\mathcal{A}_1^{\text{data}}, \mathcal{A}_1^{\text{ctrl}}$ ) := CompileDepth( $c, S_1$ )
    ( $\mathcal{A}_2^{\text{data}}, \mathcal{A}_2^{\text{ctrl}}$ ) := CompileDepth( $c, S_2$ )
    return ( $\mathcal{A}_1^{\text{data}} \cup \mathcal{A}_2^{\text{data}}, \mathcal{A}_1^{\text{ctrl}} \cup \mathcal{A}_2^{\text{ctrl}}$ )
  case [suspend {  $S'$  } when( $\gamma$ )]:
    return CompileDepth( $c, S'$ )
  case [ $\ell$ : immediate suspend {  $S'$  } when( $\gamma$ )]:
    ( $\mathcal{A}^{\text{data}}, \mathcal{A}^{\text{ctrl}}$ ) := CompileDepth( $c, S'$ )
    return ( $\mathcal{A}^{\text{data}}, \mathcal{A}^{\text{ctrl}} \cup \{\text{strt} \wedge \gamma \Rightarrow \text{next}(\ell) = \text{true}\}$ )
  case [abort {  $S'$  } when( $\gamma$ )]:
    return CompileDepth( $c, S'$ )
  case [immediate abort {  $S'$  } when( $\gamma$ )]:
    return CompileDepth( $c, S'$ )
  case [clock ( $C$ ) {  $S'$  }]: # clock declaration
    return CompileDepth( $C, S'$ )
end

```
